# Supplementary material
Source: MDPI journal article supplement (https://www.mdpi.com/1999-4907/12/1/21)
Supplement: s1 [file s1]

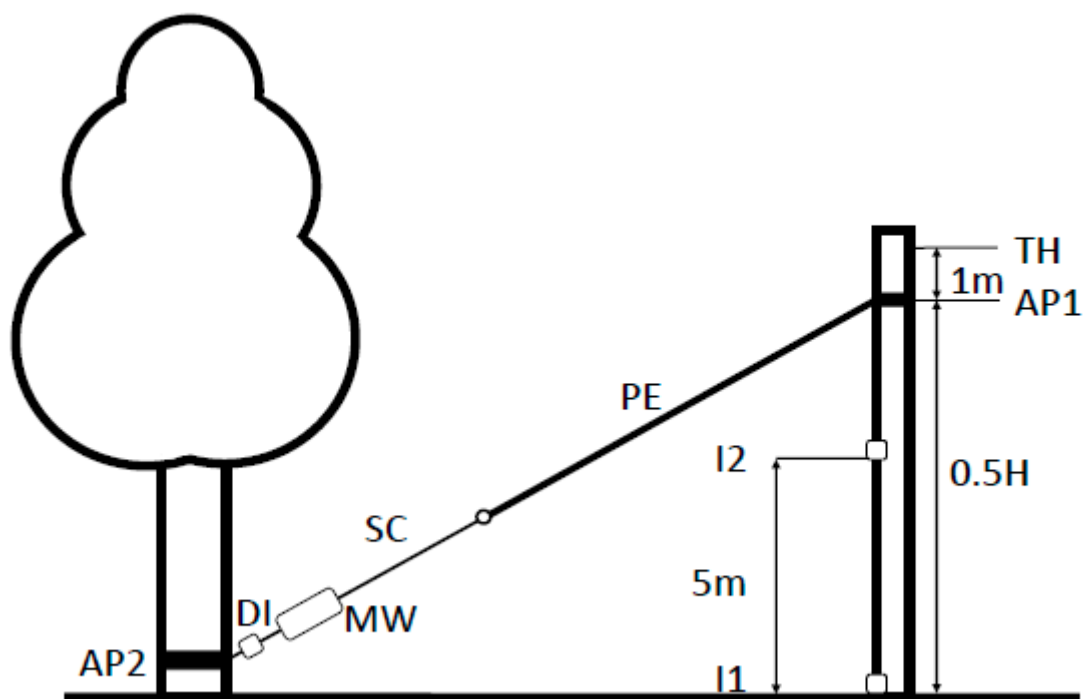

**Figure S1.** A scheme of the destructive pulling test setup. AP1 and AP2—anchor points; DI—dynamometer; MW—manual winch; I1 and I2—inclinometers; H—tree height; TH—topping height; SC—steel cable; PE—polyester extension line.



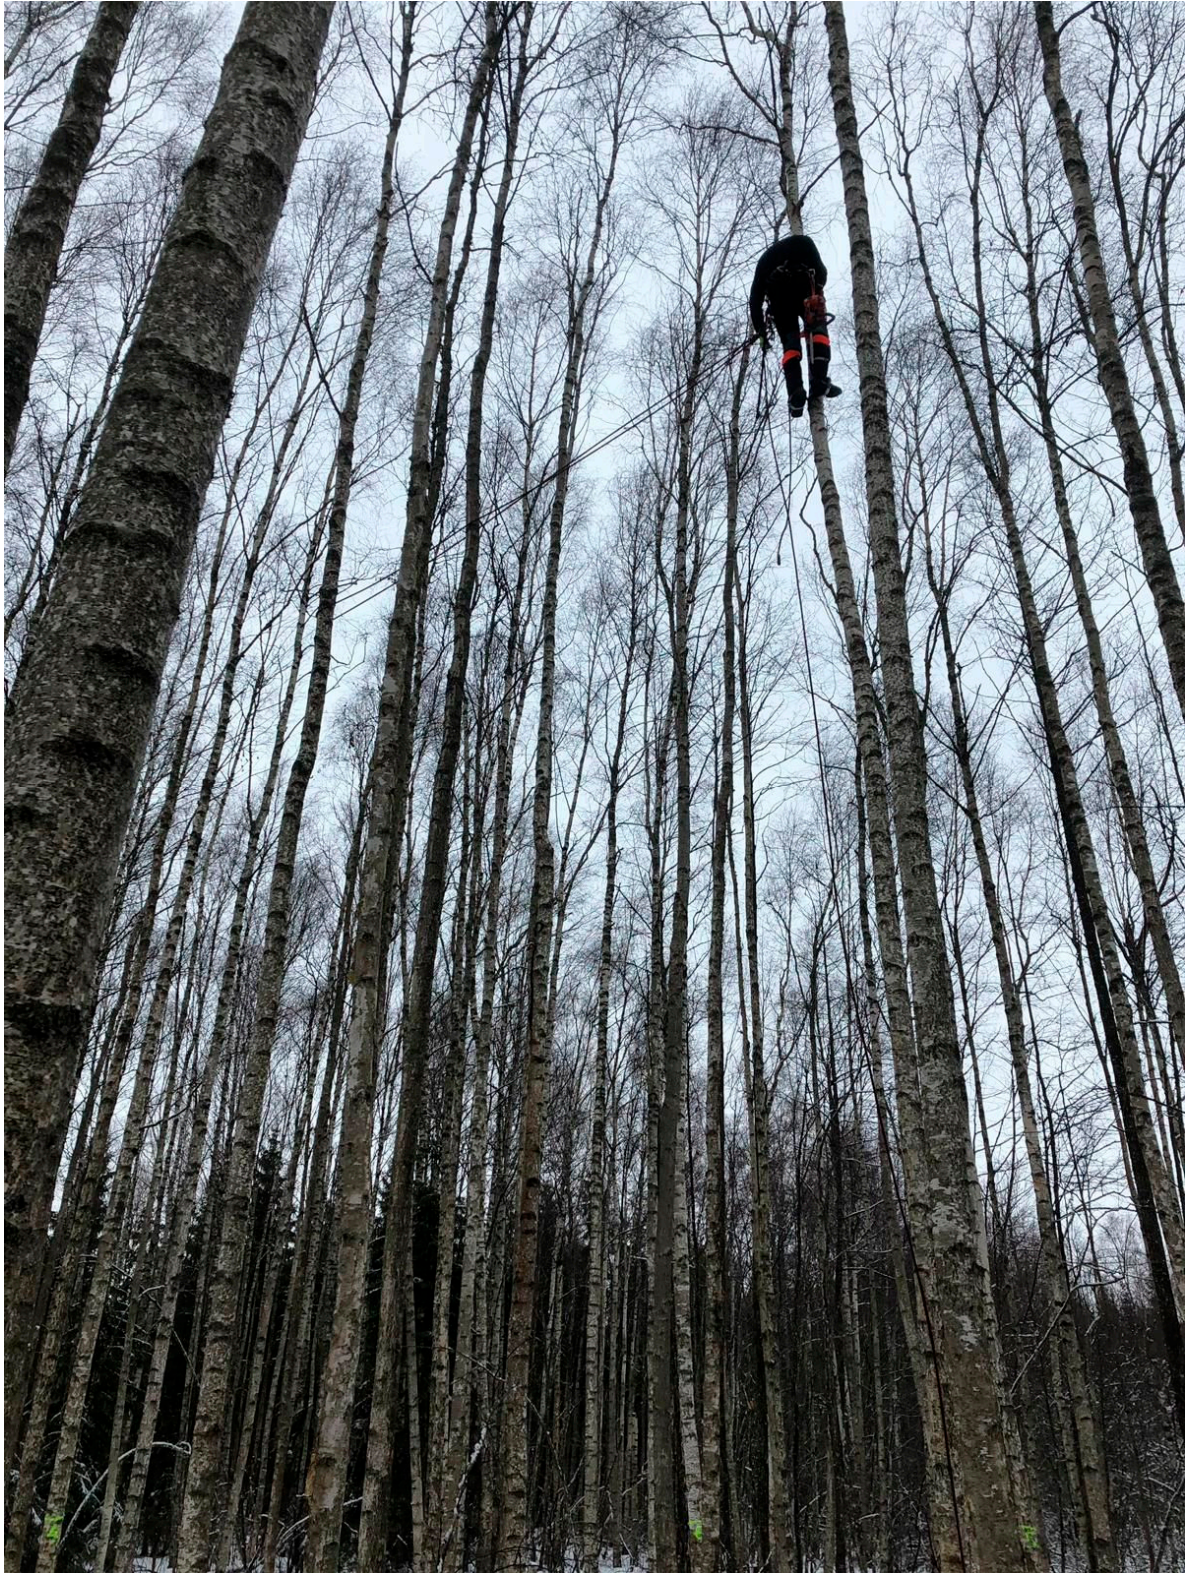

**Figure S2.** Preparation of sample tree to destructive sampling. Technical worker is limbing and topping a tree. In a periodically waterlogged site.
